# Supplementary material
Source: PubMed Central journal article supplement (PMC4962629)
Supplement: IAI.00336-16_zii999091771so1.pdf [file IAI.00336-16_zii999091771so1.pdf]

**Figure A1. Stools tested for fecal indole concentration in 50 volunteers challenged with *Cryptosporidium*.** Volunteers were grouped based on infection outcome: uninfected (no oocysts or diarrhea) and infected (oocysts + diarrhea). Boxes indicate the study day that stool samples were collected from each volunteer: Stage 1, (baseline) prior to or within 48 hours after challenge; stage 2, period when diarrhea occurred; and stage 3, period when oocyst shedding and diarrhea had resolved. Diarrheic stools are indicated (hatched). TU502 represents *C. hominis*; all other isolates are *C. parvum*. Fecal microbiota were studied in infected (#5, 29, 119, 120, 132, 178) and uninfected (#9, 123, 130, 156, 185) subjects.

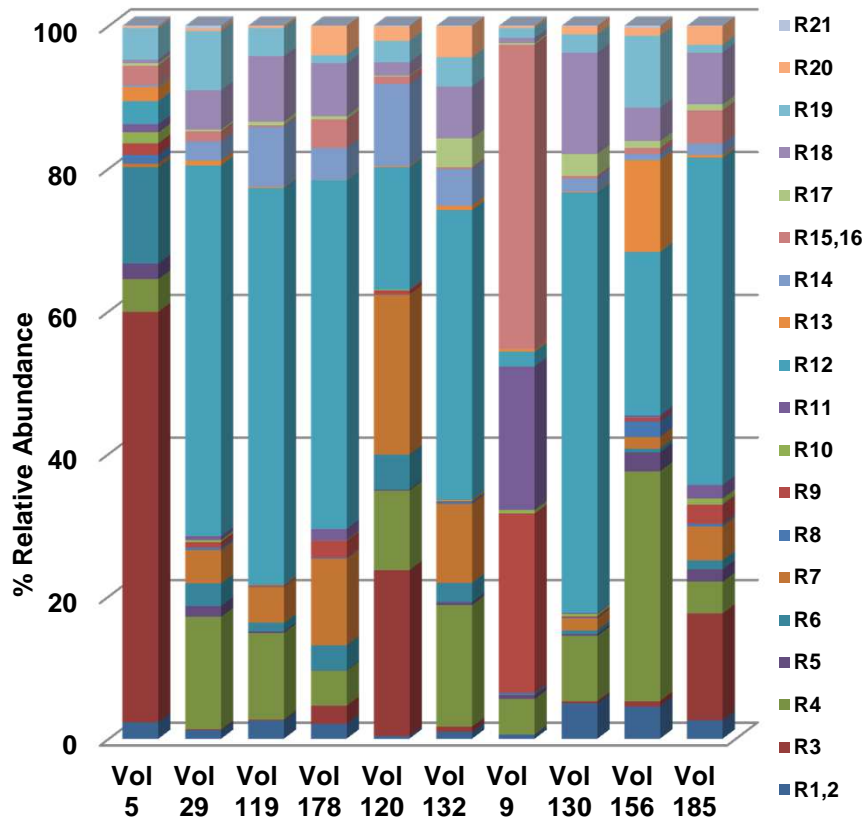

**Figure A2. Percent relative abundance for 19 common bacterial taxa in the stools of 10 healthy subjects.** Stools were collected prior to or within 48 hours after challenge with *Cryptosporidium*. See Table 1 for identification of bacteria represented by the coded designations in the legend.

**Table A1. Indole concentration (mM) in stool samples from 17 symptomatic subjects infected with *Cryptosporidium*.** Indole measurements were done at baseline (before or within 48 hours of challenge, n=18) or during diarrheal illness (n=17). Fecal indole levels are compared for parameters representing intensity of infection and severity of illness. Values represent the mean  $\pm$  standard deviation for each group. Comparisons were tested using unpaired Student's t test.

|                           | Fecal Indole Concentration (mM) |       |                          |       |
|---------------------------|---------------------------------|-------|--------------------------|-------|
|                           | At Baseline                     |       | During diarrheal illness |       |
|                           |                                 | p=    |                          | p=    |
| Onset of diarrhea         |                                 |       |                          |       |
| ≤ Day 4                   | 1.72 ± 0.65                     | 0.984 | 1.33 ± 0.93              | 0.723 |
| > Day 4                   | 1.72 ± 0.94                     |       | 1.49 ± 0.94              |       |
| Duration of diarrhea      |                                 |       |                          |       |
| ≤ 7 days                  | 1.68 ± 0.87                     | 0.773 | 1.56 ± 1.03              | 0.367 |
| >7 days                   | 1.80 ± 0.63                     |       | 1.13 ± 0.63              |       |
| Total stool weight        |                                 |       |                          |       |
| ≤1500 g                   | 1.76 ± 0.89                     | 0.819 | 1.64 ± 0.93              | 0.268 |
| >1500 g                   | 1.67 ± 0.64                     |       | 1.14 ± 0.87              |       |
| Number of unformed stools |                                 |       |                          |       |
| ≤14                       | 1.69 ± 0.85                     | 0.821 | 1.67 ± 0.93              | 0.113 |
| >14                       | 1.78 ± 0.70                     |       | 0.93 ± 0.71              |       |
| Onset of shedding         |                                 |       |                          |       |
| ≤ Day 6                   | 1.42 ± 0.84                     | 0.138 | 0.87 ± 0.66              | 0.017 |
| > Day 6                   | 1.99 ± 0.65                     |       | 1.88 ± 0.86              |       |
| Duration of shedding      |                                 |       |                          |       |
| ≤ 7 days                  | 1.63 ± 0.83                     | 0.466 | 1.54 ± 0.98              | 0.349 |
| >7 days                   | 1.94 ± 0.65                     |       | 1.07 ± 0.68              |       |
| Total oocysts shed        |                                 |       |                          |       |
| ≤10 <sup>6</sup>          | 1.35 ± 0.65                     | 0.062 | 1.20 ± 0.56              | 0.394 |
| >10 <sup>6</sup>          | 2.05 ± 0.76                     |       | 1.59 ± 1.14              |       |
